# Supplementary material for: Point-of-Care Echocardiographic Characteristics of COVID-19 Patients with Pulmonary Embolism
Source: MDPI journal article supplement (doi:10.3390/diagnostics12102380), 2022-09-30
Supplement: s1 [file s1]

**Supplemental Table S3.** Reference values of evaluated echocardiographic parameters

| Parameter                          | Normal value                     |
|------------------------------------|----------------------------------|
| LV ejection fraction               | > <b>54% F</b><br>> <b>52% M</b> |
| RV size on PLAX                    | < <b>31mm</b>                    |
| RV/LV diametar ratio               | < <b>1</b>                       |
| RA area                            | < <b>18cm2</b>                   |
| TAPSE                              | < <b>17mm</b>                    |
| S'RV                               | > <b>9cm/s</b>                   |
| PVAT (pulmonary acceleration time) | > <b>130msec</b>                 |
| RV ESP                             | <b>20-30mmHg</b>                 |
| VCI diameter                       | < <b>20mm</b>                    |
