# Supplementary material for: Point-of-Care Echocardiographic Characteristics of COVID-19 Patients with Pulmonary Embolism
Source: MDPI journal article supplement (doi:10.3390/diagnostics12102380), 2022-09-30
Supplement: s1 [file s1]

**Supplemental Table S2.** Pulmonary Embolism Severity Index (PESI) score criteria and risk classes

|                                                                   |                 |                 |
|-------------------------------------------------------------------|-----------------|-----------------|
| Age                                                               |                 |                 |
| Sex                                                               | <b>Female 0</b> | <b>Male +10</b> |
| History of cancer                                                 | <b>No 0</b>     | <b>Yes +30</b>  |
| History of heart failure                                          | <b>No 0</b>     | <b>Yes +10</b>  |
| History of chronic lung disease                                   | <b>No 0</b>     | <b>Yes +10</b>  |
| Heart rate $\geq 110$                                             | <b>No 0</b>     | <b>Yes +20</b>  |
| Systolic BP $< 100$ mmHg                                          | <b>No 0</b>     | <b>Yes +30</b>  |
| Respiratory rate $\geq 30$                                        | <b>No 0</b>     | <b>Yes +20</b>  |
| Temperature $< 36^{\circ}\text{C}$                                | <b>No 0</b>     | <b>Yes +20</b>  |
| Altered mental status (disorientation, lethargy, stupor, or coma) | <b>No 0</b>     | <b>Yes +60</b>  |
| O <sub>2</sub> saturation $< 90\%$                                | <b>No 0</b>     | <b>Yes +20</b>  |

|                   |              |                              |
|-------------------|--------------|------------------------------|
| <b>PESI score</b> | <b>Class</b> | <b>Risk 30 day mortality</b> |
| 0-65              | I            | 0.0-1.6%                     |
| 66-85             | II           | 1.7-3.5%                     |
| 86-105            | III          | 3.2-7.1%                     |
| 106-125           | IV           | 4.0-11.4%                    |
| $\geq 125$        | V            | 10-24.5%                     |
