# Supplementary material for: Point-of-Care Echocardiographic Characteristics of COVID-19 Patients with Pulmonary Embolism
Source: MDPI journal article supplement (doi:10.3390/diagnostics12102380), 2022-09-30
Supplement: s1 [file s1]

**Supplemental Table S1. Reference values of evaluated laboratory parameters**

| Parameter                         | Reference value                                        |
|-----------------------------------|--------------------------------------------------------|
| Urea                              | 2.8-8.1 mmol/L                                         |
| Glucose                           | 4.1-5.9 mmol/L                                         |
| Total bilirubine                  | up to 21 umol/L                                        |
| Alanine transaminase (ALT)        | up to 41 U/L in men, up to 33 U/L in women             |
| Aspartate transaminase (AST)      | up to 40 U/L in men, up to 32 U/L in women             |
| Lactate dehydrogenase (LDH)       | 270.0-450.0 U/L in men, 270.0-428.0 U/L in women       |
| Creatine kinase (CK)              | up to 190 U/L in men, up to 170 U/L in women           |
| Gamma-glutamyltransferase (GGT)   | 10.0-71.0 U/L in men, 6.0-42.0 U/L in women            |
| Potassium                         | 3.5-5.1 mmol/L                                         |
| Sodium                            | 136.0-145.0 mmol/L                                     |
| Chloride                          | 98.0-107.0 mmol/L                                      |
| Amylase                           | 28.0-100.0 mmol/L                                      |
| Creatinine                        | 62.0-106.0 umol/L in men, 44.0-80.0 umol/L in women    |
| Uric acid                         | 202.3-416.5 umol/L in men, 142.8-339.2 umol/L in women |
| Serum albumins                    | 35.0-52.0 g/L                                          |
| Serum proteins                    | 64.0-83.0 g/L                                          |
| C-reactive protein                | up to 5 mg/L                                           |
| Triglycerides                     | up to 1.7 mmol/L                                       |
| Total cholesterol                 | up to 5.2 mmol/L                                       |
| INR                               | 0.9-1.1                                                |
| PT                                | 82.0-121.0 %                                           |
| APTT                              | 23.0-31.9 s                                            |
| Fibrinogen                        | 2.1-4.0 g/L                                            |
| IL6                               | 0.0-7.0 pg/mL                                          |
| PCT                               | 0.00-0.05 ng/mL                                        |
| High sensitive troponin T (hsTnT) | up to 14 ng/L                                          |

|                                                      |                                                                          |
|------------------------------------------------------|--------------------------------------------------------------------------|
| N-Terminal pro-Brain natriuretic peptide (NT-proBNP) | up to 125 pg/mL                                                          |
| Fibrinogen                                           | 2.1-4.0 g/L                                                              |
| <b>Complete blood count</b>                          |                                                                          |
| Leukocytes                                           | 4.0-10.0x10 <sup>9</sup> /L                                              |
| Erythrocytes                                         | 4.5-6.5/10 <sup>12</sup> /L in men, 3.8-5.8/10 <sup>12</sup> /L in women |
| Hemoglobin                                           | 130-170g/L in men, 115-160g/L in women                                   |
| Hematocrit                                           | 0.40-0.54L/L in men, 0.37-0.47L/L in women                               |
| Thrombocytes                                         | 150.0-450.0x10 <sup>9</sup> /L                                           |
| Neutrophils                                          | 2.0-7.5x10 <sup>9</sup> /L                                               |
| Lymphocytes                                          | 1.0-4.0x10 <sup>9</sup> /L                                               |
| Monocytes                                            | 0.2-1.0x10 <sup>9</sup> /L                                               |
| Eosinophils                                          | up to 0.5x10 <sup>9</sup> /L                                             |
| Basophils                                            | up to 0.2x10 <sup>9</sup> /L                                             |
